# Supplementary material for: Efficacy of HE4, CA125, Risk of Malignancy Index and Risk of Ovarian Malignancy Index to Detect Ovarian Cancer in Women with Presumed Benign Ovarian Tumours: A Prospective, Multicentre Trial
Source: PubMed Central journal article supplement (PMC6912210; doi:10.3390/jcm8111784), 2019-10-25
Supplement: jcm-08-01784-s001.pdf [file jcm-08-01784-s001.pdf]

## SUPPLEMENTAL DATA

Additional Supplemental Data may be found in the online version of this article:

**Supplemental Figure 1.** ROC curves of serum markers and algorithms (n=218).

**Supplemental Table 1.** Histological type of presumed benign ovarian tumor.

**Supplemental Table 2.** Comparison of the specificity of the tumors markers and algorithms.

**Supplemental Figure 1. ROC curves of serum markers and algorithms (n=218).**

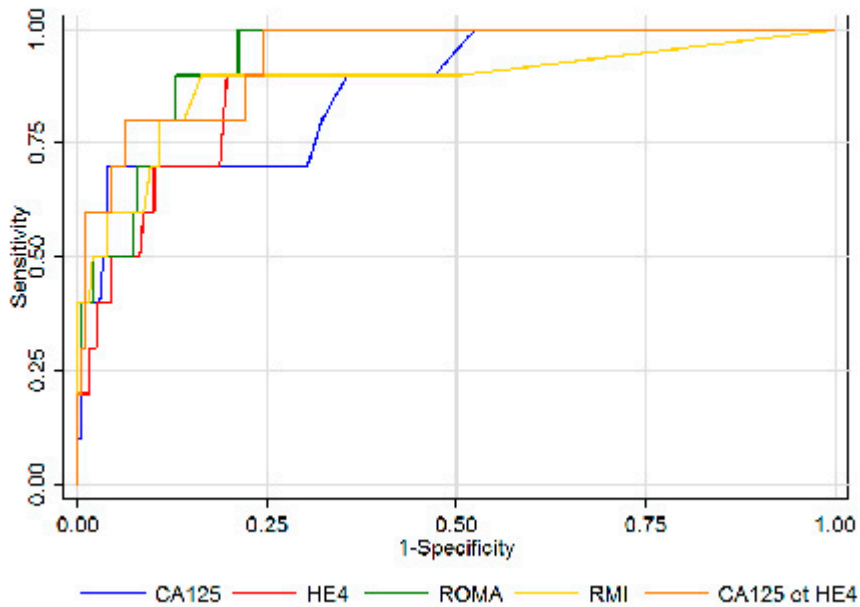

Table S1. Histological type of presumed benign ovarian tumor.

| <b>Histological findings</b>     | <b>n (%)</b>      |
|----------------------------------|-------------------|
| <b>Benign tumors</b>             | <b>209 (94.6)</b> |
| Serous cystadenoma               | 78 (35.3)         |
| Mature teratoma                  | 44 (19.9)         |
| Endometriotic cyst               | 24 (10.9)         |
| Mucinous cystadenoma             | 21 (9.5)          |
| Functional cyst or corpus luteum | 17 (7.7)          |
| Paratubal or inclusion cyst      | 15 (6.8)          |
| Ovarian fibroma or fibrothecoma  | 8 (3.6)           |
| Other                            | 2 (0.9)           |
| <b>Malignant tumors</b>          | <b>12 (5.4)</b>   |
| Borderline tumors                | 10 (4.5)          |
| Serous tumor                     | 7 (3.2)           |
| Mucinous tumor                   | 2 (0.9)           |
| Endometrioid tumor               | 1 (0.5)           |
| Malignant tumors                 | 2 (0.9)           |
| Adenocarcinoma                   | 2 (0.9)           |

Data are n (%).

Table S2. Comparison of the specificity of the tumours markers and algorithms.

|             | <b>Total<br/>(n=221)</b>    | <b>Pre-menopausal women<br/>(n=141, 63.8%)</b> | <b>Post-menopausal women<br/>(n=80, 36.2%)</b> |
|-------------|-----------------------------|------------------------------------------------|------------------------------------------------|
|             | Specificity (%)<br>[IC 95%] | Specificity (%)<br>[IC 95%]                    | Specificity (%)<br>[IC 95%]                    |
| CA125       | 90.4<br>[85.6-94.1]         | 87.5<br>[80.7-92.5]                            | 95.9<br>[88.5-99.1]                            |
| HE4         | 91.4<br>[86.7-94.8]         | 87.5<br>[80.7-92.5]                            | 98.6<br>[92.6-100]                             |
| CA125 + HE4 | 99.5<br>[97.4-100]          | 100<br>[97.3-100]                              | 98.6<br>[92.6-100]                             |
| RMI         | 99.0<br>[96.6-99.9]         | 99.3<br>[95.9-100]                             | 98.6<br>[92.6-100]                             |
| ROMA        | 83.3<br>[77.5-88]           | 75.7<br>[67.6-82.7]                            | 97.3<br>[90.5-99.7]                            |
